# Supplementary material
Source: MDPI journal article supplement (https://www.mdpi.com/1422-0067/23/13/7309)
Supplement: s1 [file s1]

Archive with 1 entries (1 files):
- ijms-1776752-supplementary.pdf
